# Supplementary material
Source: PubMed Central journal article supplement (PMC6005659)
Supplement: NIHMS957129-supplement-supp_table_1.pdf [file NIHMS957129-supplement-supp_table_1.pdf]

## Olmeda et al. Supplementary Table S1

| <b>Line</b> | <b>Stage</b>  | <b>BRAF</b> | <b>PTEN</b> | <b>N-ras</b> | <b>c-KIT</b> | <b>CDK4</b> |
|-------------|---------------|-------------|-------------|--------------|--------------|-------------|
| WM164       | MET           | V600E       | WT          | WT           | WT           | WT          |
| WM35        | RGP           | V600E       | Mutant      | WT           | WT           | WT          |
| WM902B      | MET           | V600E       | WT          | WT           | WT           | WT          |
| WM115       | VGP           | V600D       | Hem Del     | WT           | WT           | WT          |
| 451LU       | Xenograft MET | V600E       | WT          | WT           | WT           | WT          |
| UACC-62     | MET           | V600E       | Mutant      | WT           | WT           | WT          |
| SK-Mel-28   | MET           | V600E       | MU          | WT           | WT           | R24C        |
| SK-Mel-103  | MET           | WT          | WT          | Q61R         | WT           | WT          |
| SK-Mel-147  | MET           | WT          | WT          | Q61R         | WT           | WT          |

**Table S1. Human melanoma cell lines used in this study.** Genetic information are as described in Soengas et al. Nature 2001 and <http://www.wistar.org/lab/meenhard-herlyn-dvm-dsc/page/melanoma-cell-lines-0>.
