# Supplementary material
Source: PubMed Central journal article supplement (PMC6005659)
Supplement: NIHMS957129-supplement-supp_table_2.pdf [file NIHMS957129-supplement-supp_table_2.pdf]

## Olmeda et al. Extended Data. Table S2

| Gene symbols | 451LU vs WM164 | SK-Mel-103 vs WM164 | SK-Mel-28 vs WM164 |
|--------------|----------------|---------------------|--------------------|
| <b>MDK</b>   | 5.34           | 3.91                | 2.37               |
| PRRT2        | 4.11           | 7.36                | 10.35              |
| PROCR        | 4.10           | 5.49                | 5.32               |
| RPL12        | 3.75           | 3.20                | 3.34               |
| RPL28        | 3.40           | 1.93                | 1.66               |
| AGRN         | 3.38           | 2.24                | 3.45               |
| CD9          | 3.24           | 1.70                | 1.77               |
| SDC1         | 3.12           | 5.50                | 3.83               |
| TMSB10       | 2.81           | 3.38                | 3.19               |
| IGF2BP3      | 2.61           | 4.54                | 3.86               |
| IGF2BP1      | 2.53           | 3.26                | 2.75               |
| CTSZ         | 2.35           | 2.30                | 1.75               |
| RNPEP        | 2.28           | 2.91                | 1.96               |
| CALU         | 2.19           | 1.26                | 2.30               |
| ILF2         | 2.09           | 5.76                | 4.29               |
| HNRNPK       | 2.05           | 2.42                | 2.36               |
| RPS15A       | 2.05           | 3.81                | 1.08               |
| TUBB4A       | 1.94           | 1.52                | 1.67               |
| DBN1         | 1.86           | 1.30                | 1.44               |
| SRP14        | 1.84           | 9.13                | 7.88               |
| CAPNS1       | 1.74           | 1.66                | 1.19               |
| ITGB5        | 1.72           | 2.61                | 2.46               |
| RBM3         | 1.61           | 5.83                | 4.60               |
| PLAUR        | 1.60           | 3.98                | 3.18               |
| RHOB         | 1.58           | 1.99                | 1.62               |
| ALCAM        | 1.53           | 5.14                | 3.89               |
| FLG2         | 1.52           | 4.02                | 5.16               |
| CBR1         | 1.45           | 0.82                | 0.77               |
| RPL31        | 1.45           | 1.12                | 1.05               |
| RPS3A        | 1.43           | 1.62                | 1.44               |
| LGALS1       | 1.39           | 1.34                | 1.67               |
| RPS23        | 1.37           | 1.13                | 0.92               |
| TUBB3        | 1.29           | 1.15                | 0.74               |
| RPLP0        | 1.14           | 1.48                | 0.70               |
| RPS3         | 1.14           | 1.33                | 0.72               |
| RUVBL1       | 1.11           | 1.28                | 1.04               |
| HSD17B12     | 1.07           | 1.42                | 2.31               |
| PSMD14       | 1.01           | 0.97                | 1.14               |
| RPLP2        | 1.00           | 1.96                | 1.57               |
| TUBA1C       | 0.96           | 1.60                | 1.28               |
| TAOK3        | 0.91           | 2.01                | 2.40               |
| MARCKSL1     | -0.98          | -1.43               | -1.12              |
| IGF1R        | -2.21          | -2.75               | -1.12              |
| DAAM2        | -2.49          | -2.14               | -2.12              |
| FXYD3        | -4.99          | -2.05               | -1.56              |

**Table S2. Pro-metastatic factors identified by proteomic analyses of the secretome of the indicated cell lines.** Shown are differential ratios of protein expression (Log2 scale) estimated with respect to basal levels in the non-lymphangiogenic cell line WM164. Additional filters were applied to remove factors present in the non-metastatic WM35, which does not activate distant lymphangiogenesis.
