# Supplementary material
Source: PubMed Central journal article supplement (PMC6005659)
Supplement: NIHMS957129-supplement-supp_table_3.pdf [file NIHMS957129-supplement-supp_table_3.pdf]

# Olmeda et al. Supplementary Table S3

|                                            | MDK/NEG                 | shM1/shC | shM5/shC |        |
|--------------------------------------------|-------------------------|----------|----------|--------|
| MDK/NEG UP & shM1/shC DOWN & shM5/shC DOWN | MTOR_UP.N4.V1_UP        | <0.001   | <0.001   | <0.001 |
|                                            | HINATA_NFKB_IMMUNO_INF  | <0.001   | <0.001   | <0.001 |
|                                            | LTE2_UP.V1_DN           | <0.001   | 0.001    | 0.026  |
|                                            | STK33_UP                | <0.001   | 0.006    | <0.001 |
|                                            | EGFR_UP.V1_UP           | <0.001   | <0.001   | <0.001 |
|                                            | CAMP_UP.V1_UP           | <0.001   | 0.001    | <0.001 |
|                                            | BMI1_DN_MEL18_DN.V1_UP  | <0.001   | <0.001   | 0.002  |
|                                            | E2F1_UP.V1_DN           | <0.001   | 0.003    | <0.001 |
|                                            | HOXA9_DN.V1_UP          | 0.001    | 0.009    | <0.001 |
|                                            | ALK_DN.V1_UP            | 0.002    | 0.003    | 0.016  |
|                                            | MEL18_DN.V1_UP          | 0.004    | 0.001    | 0.022  |
|                                            | RB_P107_DN.V1_DN        | 0.012    | 0.200    | <0.001 |
|                                            | ESC_J1_UP_EARLY.V1_DN   | 0.012    | 0.197    | 0.004  |
|                                            | KRAS.300_UP.V1_DN       | 0.025    | 0.007    | 0.034  |
|                                            | RPS14_DN.V1_UP          | 0.028    | 0.014    | 0.026  |
|                                            | SIRNA_EIF4GI_UP         | 0.029    | 0.022    | 0.002  |
|                                            | DCA_UP.V1_UP            | 0.066    | 0.199    | 0.206  |
|                                            | P53_DN.V2_UP            | 0.120    | 0.022    | 0.165  |
|                                            | IL15_UP.V1_DN           | 0.123    | 0.198    | 0.130  |
|                                            | VEGF_A_UP.V1_UP         | 0.140    | <0.001   | <0.001 |
| CAHOY_ASTROGLIAL                           | 0.220                   | 0.003    | 0.093    |        |
| HINATA_NFKB_MATRIX                         | 0.249                   | 0.001    | 0.034    |        |
| MDK/NEG DOWN & shM1/shC UP & shM5/shC UP   | RB_P107_DN.V1_UP        | <0.001   | <0.001   | <0.001 |
|                                            | PRC2_EDD_UP.V1_UP       | <0.001   | <0.001   | <0.001 |
|                                            | CSR_LATE_UP.V1_UP       | <0.001   | <0.001   | <0.001 |
|                                            | HOXA9_DN.V1_DN          | <0.001   | 0.003    | 0.002  |
|                                            | E2F3_UP.V1_UP           | <0.001   | <0.001   | <0.001 |
|                                            | E2F1_UP.V1_UP           | <0.001   | <0.001   | <0.001 |
|                                            | MEK_UP.V1_UP            | <0.001   | 0.002    | <0.001 |
|                                            | LTE2_UP.V1_UP           | <0.001   | 0.004    | <0.001 |
|                                            | RPS14_DN.V1_DN          | <0.001   | <0.001   | <0.001 |
|                                            | EGFR_UP.V1_DN           | <0.001   | <0.001   | <0.001 |
|                                            | KRAS.DF.V1_UP           | <0.001   | <0.001   | <0.001 |
|                                            | GCNP_SHH_UP_EARLY.V1_UP | <0.001   | <0.001   | <0.001 |
|                                            | TBK1.DF_UP              | <0.001   | 0.002    | 0.012  |
|                                            | RB_DN.V1_UP             | <0.001   | 0.005    | <0.001 |
|                                            | ERB2_UP.V1_UP           | <0.001   | 0.002    | 0.001  |
|                                            | GCNP_SHH_UP_LATE.V1_UP  | <0.001   | <0.001   | <0.001 |
|                                            | PRC2_EZH2_UP.V1_UP      | <0.001   | 0.004    | <0.001 |
|                                            | VEGF_A_UP.V1_DN         | <0.001   | <0.001   | <0.001 |
|                                            | ESC_V6.5_UP_LATE.V1_UP  | <0.001   | 0.229    | 0.172  |
|                                            | RAF_UP.V1_UP            | 0.001    | 0.008    | 0.033  |
|                                            | PDGF_UP.V1_UP           | 0.001    | <0.001   | 0.002  |
|                                            | P53_DN.V1_UP            | 0.001    | 0.001    | 0.001  |
|                                            | IL21_UP.V1_DN           | 0.004    | 0.168    | 0.020  |
|                                            | CRX_NRL_DN.V1_UP        | 0.005    | 0.215    | 0.017  |
|                                            | KRAS.AMP.LUNG_UP.V1_UP  | 0.008    | 0.012    | 0.042  |
|                                            | PRC2_SUZ12_UP.V1_UP     | 0.009    | 0.046    | <0.001 |
|                                            | PRC1_BMI_UP.V1_UP       | 0.013    | 0.008    | 0.001  |
|                                            | ALK_DN.V1_DN            | 0.013    | 0.047    | 0.023  |
|                                            | ATF2_UP.V1_UP           | 0.016    | 0.132    | 0.051  |
|                                            | SRC_UP.V1_DN            | 0.031    | 0.024    | 0.042  |
|                                            | PRC2_EZH2_UP.V1_DN      | 0.034    | 0.054    | 0.027  |
|                                            | SIRNA_EIF4GI_DN         | 0.040    | 0.143    | 0.126  |
| ATM_DN.V1_DN                               | 0.043                   | 0.228    | 0.011    |        |
| TBK1.DN.48HRS_UP                           | 0.055                   | 0.116    | 0.052    |        |
| PDGF_ERK_DN.V1_DN                          | 0.085                   | 0.106    | <0.001   |        |
| LEF1_UP.V1_UP                              | 0.100                   | 0.054    | 0.041    |        |
| NRL_DN.V1_UP                               | 0.148                   | 0.171    | 0.010    |        |

**Table S3. Signaling pathways identified by RNA seq to be controlled by MDK in lymphatic endothelial cells (LEC).** Transcriptomic analyses were performed in MDK gain or loss of function studies (LoF and GoF) as indicated in Fig. 5a,b. Shown are Oncogenic Signatures found by gene set enrichment analyses (GSEA) to show a consistent (opposed) alterations in both settings. FDR for each gene set are shown. MDK/Neg, stands for comparative analyses of WM164 overexpressing MDK vs the parental (MDK negative control). shM1/shC and shM2/shC correspond to data from SK-Mel-147 expressing MDK sh1 or sh5, respectively, and analyzed with respect to the parental MDK-expressing cells transduced with shRNA control.
