# Supplementary material
Source: PubMed Central journal article supplement (PMC6005659)
Supplement: NIHMS957129-supplement-supp_table_4.pdf [file NIHMS957129-supplement-supp_table_4.pdf]

# Olmeda et al. Supplementary Table S4

| Log2(FC) | WM164 - MDK/NEG |             |             | SK-Mel-147 shM1/shC |             |             | SK-Mel-147 shM5/shC |             |             |      |              |            |
|----------|-----------------|-------------|-------------|---------------------|-------------|-------------|---------------------|-------------|-------------|------|--------------|------------|
|          | Replicate 1     | Replicate 2 | Replicate 3 | Replicate 1         | Replicate 2 | Replicate 3 | Replicate 1         | Replicate 2 | Replicate 3 | mTOR | Inflammation | Cell Cycle |
| Gene     |                 |             |             |                     |             |             |                     |             |             |      |              |            |
| PHGDH    | 6.738           | 6.475       | 6.471       | -3.026              | -3.848      | -3.186      | -2.890              | -3.224      | -2.761      |      |              |            |
| SLC6A9   | 4.641           | 4.218       | 4.431       | -2.183              | -2.749      | -1.805      | -1.560              | -1.039      | -1.527      |      |              |            |
| CADM3    | 4.556           | 4.293       | 4.123       | -1.737              | -1.610      | -1.159      | -1.630              | -2.139      | -1.995      |      |              |            |
| H0XB9    | 4.239           | 4.107       | 4.134       | -1.258              | -1.442      | -1.564      | -1.439              | -1.657      | -1.358      |      |              |            |
| CLDN1    | 3.763           | 3.829       | 3.980       | -1.694              | -1.562      | -1.227      | -1.211              | -1.312      | -1.961      |      |              |            |
| ULBP1    | 4.010           | 3.668       | 3.865       | -2.180              | -1.812      | -1.780      | -1.379              | -0.773      | -1.015      |      |              |            |
| CHAC1    | 3.944           | 3.626       | 3.768       | -2.016              | -2.441      | -1.973      | -1.647              | -1.242      | -1.535      |      |              |            |
| SESN2    | 3.954           | 3.640       | 3.702       | -0.428              | -0.804      | -0.832      | -0.732              | -0.645      | -0.994      |      |              |            |
| STC2     | 3.868           | 3.619       | 3.765       | -1.139              | -1.140      | -1.157      | -0.762              | -0.826      | -0.894      |      |              |            |
| CTH      | 3.684           | 3.586       | 3.875       | -1.233              | -0.876      | -1.163      | -0.793              | -1.173      | -0.642      |      |              |            |
| DDIT4    | 3.874           | 3.584       | 3.656       | -1.531              | -1.485      | -1.383      | -1.165              | -1.175      | -1.227      |      |              |            |
| ASNS     | 3.633           | 3.652       | 3.695       | -1.916              | -1.971      | -1.999      | -1.394              | -1.307      | -1.388      |      |              |            |
| SULT1E1  | 3.473           | 3.651       | 3.729       | -1.285              | -1.139      | -0.769      | -1.622              | -1.875      | -1.407      |      |              |            |
| LURAP1L  | 3.599           | 3.523       | 3.588       | -0.833              | -0.691      | -1.313      | -1.014              | -1.049      | -0.554      |      |              |            |
| SLC7A11  | 3.376           | 3.405       | 3.652       | -1.020              | -0.841      | -1.104      | -0.788              | -1.144      | -0.995      |      |              |            |
| PSAT1    | 3.341           | 3.359       | 3.461       | -2.020              | -1.843      | -1.978      | -1.491              | -1.250      | -1.336      |      |              |            |
| TRIB3    | 3.395           | 3.092       | 3.089       | -0.706              | -0.919      | -0.680      | -0.714              | -0.504      | -0.752      |      |              |            |
| SLC3A2   | 3.160           | 2.880       | 2.963       | -0.751              | -0.903      | -0.761      | -0.622              | -0.549      | -0.673      |      |              |            |
| CCL20    | 2.786           | 2.657       | 2.865       | -1.141              | -1.390      | -1.300      | -0.793              | -0.816      | -0.938      |      |              |            |
| GGT5     | 2.936           | 2.655       | 2.606       | -0.713              | -1.078      | -0.661      | -0.714              | -1.473      | -1.117      |      |              |            |
| ADM2     | 2.835           | 2.615       | 2.622       | -1.083              | -1.380      | -1.343      | -0.808              | -0.755      | -0.777      |      |              |            |
| PCK2     | 2.693           | 2.503       | 2.420       | -1.054              | -1.125      | -1.033      | -0.982              | -0.767      | -0.960      |      |              |            |
| ABI3BP   | 2.398           | 2.488       | 2.601       | -0.907              | -1.003      | -0.853      | -0.891              | -1.108      | -0.817      |      |              |            |
| MTHFD2   | 2.403           | 2.435       | 2.504       | -1.140              | -1.085      | -1.208      | -0.874              | -0.956      | -0.954      |      |              |            |
| VEGFA    | 2.605           | 2.353       | 2.368       | -0.697              | -0.874      | -0.973      | -0.533              | -0.550      | -0.823      |      |              |            |
| IL6      | 2.704           | 2.145       | 2.441       | -1.619              | -1.575      | -1.396      | -0.847              | -0.870      | -0.623      |      |              |            |
| RNF144B  | 2.388           | 2.310       | 2.517       | -0.789              | -0.834      | -0.665      | -0.621              | -0.791      | -0.698      |      |              |            |
| SLC7A5   | 2.515           | 2.231       | 2.343       | -0.939              | -1.276      | -1.234      | -0.980              | -0.822      | -1.061      |      |              |            |
| NAV3     | 2.132           | 2.196       | 2.672       | -0.709              | -0.780      | -0.730      | -0.645              | -0.553      | -0.657      |      |              |            |
| MGC16121 | 2.316           | 2.368       | 2.302       | -1.500              | -2.391      | -1.634      | -1.297              | -1.619      | -1.620      |      |              |            |
| CXCL5    | 2.337           | 2.318       | 2.300       | -2.026              | -1.839      | -1.688      | -1.199              | -1.452      | -0.960      |      |              |            |
| SLC4A5   | 2.336           | 2.342       | 2.265       | -0.855              | -1.227      | -0.973      | -1.012              | -1.095      | -0.969      |      |              |            |
| GPT2     | 2.284           | 2.117       | 2.145       | -0.910              | -0.903      | -0.986      | -0.850              | -0.620      | -0.877      |      |              |            |
| SLC1A5   | 2.273           | 2.087       | 2.171       | -0.978              | -1.211      | -1.044      | -0.833              | -0.875      | -0.979      |      |              |            |
| PMAI1P1  | 2.086           | 2.102       | 2.202       | -0.583              | -0.591      | -0.649      | -0.686              | -0.464      | -0.722      |      |              |            |
| PSTPIP2  | 2.038           | 1.984       | 2.225       | -1.032              | -1.013      | -0.964      | -0.840              | -0.788      | -0.575      |      |              |            |
| CYFIP2   | 2.124           | 1.997       | 1.912       | -0.835              | -0.808      | -0.544      | -0.533              | -0.647      | -0.746      |      |              |            |
| EFNB1    | 2.168           | 1.898       | 1.954       | -0.693              | -0.777      | -0.594      | -0.515              | -0.635      | -0.708      |      |              |            |
| AOX1     | 2.050           | 2.021       | 1.938       | -0.638              | -0.669      | -0.507      | -0.754              | -0.731      | -0.641      |      |              |            |
| GLIPR1   | 1.897           | 1.901       | 2.111       | -0.952              | -0.841      | -0.725      | -0.917              | -0.686      | -0.636      |      |              |            |
| TLR3     | 1.826           | 1.891       | 2.170       | -1.027              | -0.351      | -0.399      | -0.425              | -0.812      | -0.736      |      |              |            |
| ICAM1    | 2.071           | 1.810       | 1.960       | -0.647              | -0.736      | -0.598      | -0.529              | -0.753      | -0.701      |      |              |            |
| EIF4EBP1 | 2.122           | 1.792       | 1.734       | -0.739              | -0.975      | -0.926      | -0.924              | -0.622      | -0.838      |      |              |            |
| FGL1     | 2.106           | 1.303       | 1.872       | -0.984              | -0.621      | -1.220      | -1.355              | -1.204      | -1.296      |      |              |            |
| NUPR1    | 1.906           | 1.603       | 1.487       | -0.994              | -1.146      | -1.258      | -0.862              | -0.679      | -0.827      |      |              |            |
| GARS     | 1.661           | 1.630       | 1.688       | -0.816              | -0.792      | -0.806      | -0.652              | -0.585      | -0.656      |      |              |            |
| TMEM154  | 1.483           | 1.650       | 1.730       | -1.047              | -0.784      | -0.581      | -0.757              | -1.189      | -0.780      |      |              |            |
| MRGPRX3  | 1.326           | 1.678       | 1.747       | -1.019              | -1.417      | -1.030      | -0.588              | -0.893      | -0.951      |      |              |            |
| GPX8     | 1.624           | 1.573       | 1.545       | -1.254              | -1.230      | -0.993      | -1.311              | -1.833      | -1.014      |      |              |            |
| CBS      | 1.715           | 1.513       | 1.483       | -1.155              | -1.263      | -1.349      | -0.931              | -0.732      | -1.012      |      |              |            |
| TLR2     | 1.631           | 1.155       | 1.837       | -1.328              | -1.049      | -1.034      | -0.707              | -0.929      | -0.550      |      |              |            |
| JDP2     | 1.564           | 1.410       | 1.434       | -1.173              | -1.138      | -1.246      | -0.861              | -0.932      | -0.907      |      |              |            |
| LST1     | 1.194           | 1.633       | 1.562       | -1.234              | -0.964      | -1.054      | -1.035              | -0.665      | -0.446      |      |              |            |
| ANXA3    | 1.565           | 1.317       | 1.142       | -0.614              | -0.734      | -0.503      | -0.877              | -0.721      | -0.755      |      |              |            |
| SLC16A6  | 1.170           | 1.492       | 1.312       | -0.732              | -0.888      | -1.136      | -0.567              | -0.835      | -1.160      |      |              |            |
| PLD6     | 1.342           | 1.219       | 1.015       | -0.754              | -0.633      | -1.035      | -0.986              | -0.673      | -0.422      |      |              |            |
| LPCAT2   | 1.011           | 1.238       | 1.166       | -0.840              | -0.727      | -0.664      | -0.797              | -0.410      | -0.578      |      |              |            |
| FAM107A  | 1.092           | 1.011       | 1.102       | -1.068              | -1.146      | -0.830      | -0.955              | -1.494      | -1.085      |      |              |            |
| HNMT     | 1.100           | 1.133       | 0.876       | -1.145              | -0.958      | -0.726      | -0.929              | -0.577      | -0.488      |      |              |            |
| NSUN5    | 1.199           | 0.871       | 1.031       | -0.323              | -0.654      | -1.132      | -0.362              | -0.910      | -0.844      |      |              |            |
| C6orf115 | 1.013           | 0.739       | 0.989       | -1.039              | -0.665      | -0.708      | -0.661              | -0.620      | -0.567      |      |              |            |
| CRTAC1   | 0.902           | 0.949       | 0.553       | -0.451              | -1.066      | -0.522      | -0.863              | -0.334      | -0.891      |      |              |            |
| APLN     | 0.884           | 0.535       | 0.694       | -1.694              | -2.019      | -1.565      | -1.577              | -1.709      | -1.613      |      |              |            |
| CENPQ    | -0.640          | -0.554      | -0.819      | 0.618               | 0.650       | 0.716       | 0.668               | 0.730       | 0.564       |      |              |            |
| PRICKLE4 | -0.876          | -0.868      | -0.908      | 0.611               | 0.768       | 0.662       | 0.779               | 0.818       | 0.223       |      |              |            |
| SETBP1   | -1.143          | -0.758      | -1.223      | 0.963               | 0.941       | 0.787       | 0.809               | 1.024       | 0.649       |      |              |            |
| TUBD1    | -1.053          | -0.956      | -1.123      | 0.507               | 0.715       | 0.759       | 0.396               | 0.626       | 0.890       |      |              |            |
| ALDH3A2  | -1.096          | -0.995      | -1.056      | 0.653               | 0.752       | 0.566       | 0.746               | 0.742       | 0.744       |      |              |            |
| GIA4     | -1.596          | -0.896      | -1.109      | 1.539               | 1.305       | 1.356       | 0.993               | 0.849       | 0.837       |      |              |            |
| UCP2     | -1.571          | -0.950      | -1.157      | 1.121               | 1.133       | 0.767       | 0.421               | 1.059       | 1.034       |      |              |            |
| RDH10    | -1.335          | -1.213      | -1.149      | 0.964               | 1.024       | 0.942       | 0.730               | 0.674       | 0.663       |      |              |            |
| PDK4     | -1.475          | -1.872      | -1.045      | 0.732               | 0.705       | 0.505       | 0.571               | 0.794       | 0.839       |      |              |            |
| RADIL    | -1.175          | -1.606      | -1.624      | 0.937               | 0.512       | 0.835       | 0.774               | 0.601       | 0.511       |      |              |            |
| ATAD5    | -1.714          | -1.031      | -1.676      | 0.688               | 0.968       | 0.659       | 0.639               | 0.737       | 0.509       |      |              |            |
| KHK      | -1.708          | -1.406      | -1.514      | 0.864               | 0.641       | 0.409       | 0.373               | 0.742       | 0.729       |      |              |            |
| GAB1     | -1.709          | -1.535      | -1.450      | 0.689               | 0.723       | 0.685       | 0.607               | 0.546       | 0.710       |      |              |            |
| PARD6G   | -1.572          | -1.557      | -1.607      | 0.815               | 0.782       | 0.622       | 0.566               | 0.622       | 0.748       |      |              |            |
| DCLK1    | -1.968          | -1.383      | -1.440      | 0.847               | 1.210       | 0.981       | 0.801               | 0.694       | 0.647       |      |              |            |
| PPAP2A   | -1.674          | -1.563      | -1.735      | 1.120               | 1.073       | 0.936       | 0.676               | 0.760       | 0.707       |      |              |            |
| DTX4     | -2.030          | -1.762      | -1.837      | 1.300               | 1.227       | 1.235       | 0.992               | 1.128       | 0.963       |      |              |            |
| PSG1     | -1.547          | -2.012      | -2.131      | 1.599               | 1.158       | 1.314       | 1.227               | 0.752       | 0.906       |      |              |            |
| HCRTR1   | -2.605          | -1.760      | -1.904      | 1.097               | 1.058       | 1.126       | 0.587               | 0.686       | 0.586       |      |              |            |
| ABCA4    | -2.382          | -2.188      | -2.062      | 1.237               | 1.183       | 1.044       | 1.232               | 1.239       | 0.976       |      |              |            |
| SCNN1B   | -2.253          | -2.525      | -1.990      | 1.073               | 0.765       | 0.585       | 1.403               | 1.188       | 1.238       |      |              |            |
| CLEC4M   | -2.547          | -2.239      | -2.233      | 1.045               | 1.032       | 0.703       | 0.641               | 1.358       | 1.181       |      |              |            |
| SESN3    | -2.868          | -1.998      | -2.410      | 1.026               | 1.034       | 0.799       | 0.830               | 0.769       | 0.845       |      |              |            |
| RCN3     | -2.492          | -2.271      | -3.020      | 1.182               | 1.021       | 0.938       | 0.884               | 0.701       | 0.621       |      |              |            |
| CA2      | -2.824          | -2.784      | -2.950      | 0.775               | 1.432       | 0.694       | 1.003               | 0.830       | 1.063       |      |              |            |
| FAM111B  | -3.465          | -2.966      | -2.936      | 0.685               | 1.008       | 0.795       | 0.565               | 0.647       | 0.770       |      |              |            |
| GUCY1A3  | -3.299          | -3.539      | -3.611      | 1.122               | 1.082       | 0.879       | 0.981               | 0.964       | 0.898       |      |              |            |
| NTS      | -4.967          | -2.854      | -2.832      | 1.206               | 1.216       | 1.025       | 0.934               | 1.140       | 1.378       |      |              |            |

**Table S4. MDK-induced changes in the LEC transcriptome.** Data corresponds to gene lists and the corresponding expression changes shown in the heatmap of Fig. 5b. Genes with the indicated functions are labeled in red in the right table.
