# Supplementary material
Source: PubMed Central journal article supplement (PMC6005659)

Fig. 4d

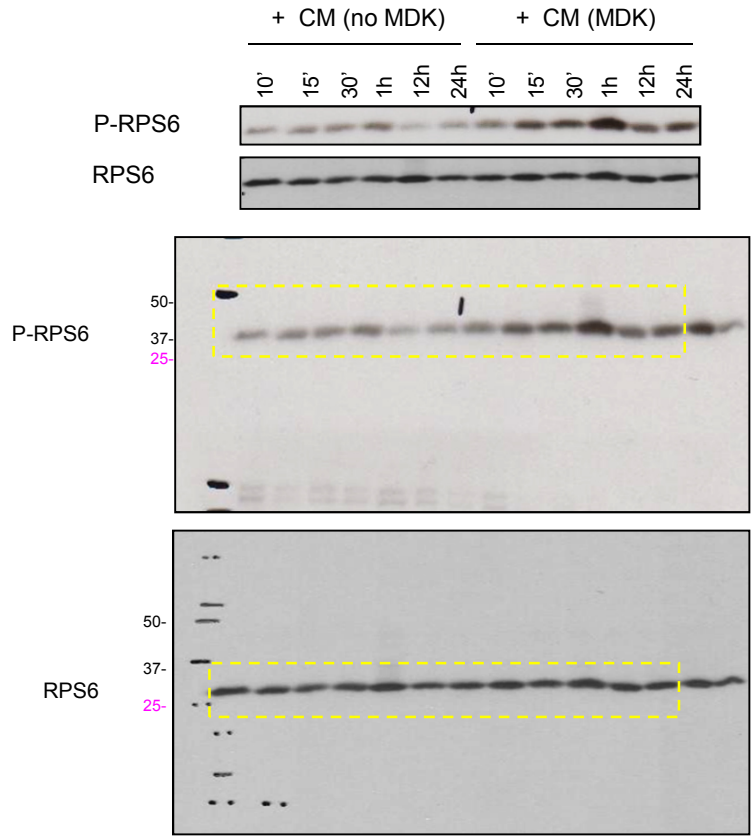

Fig. 4e

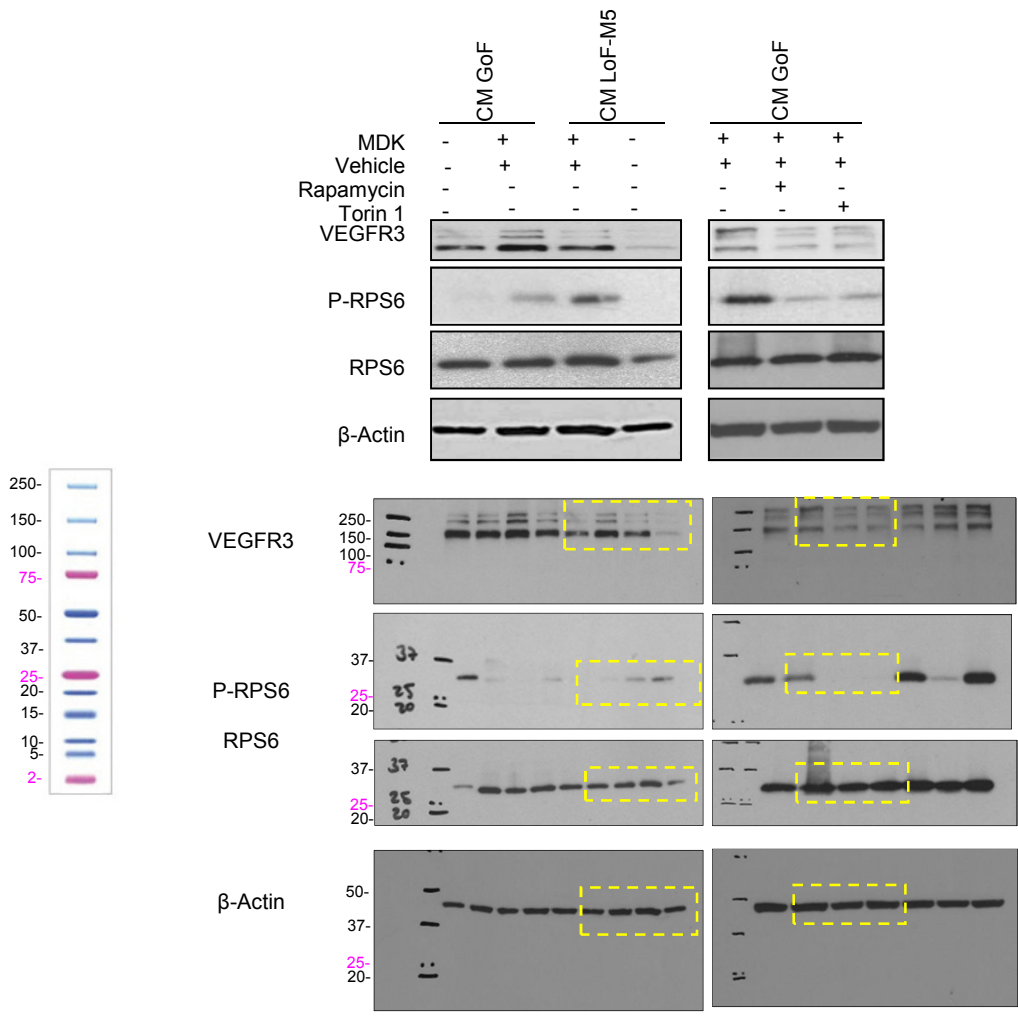

Supplement: NIHMS957129-supplement-Supplemental_figure_1-blots.pdf [file NIHMS957129-supplement-Supplemental_figure_1-blots.pdf]
